# Supplementary material
Source: PubMed Central journal article supplement (PMC4413902)
Supplement: NIHMS683485-supplement-02.pdf [file NIHMS683485-supplement-02.pdf]

## Supplementary Tables

**Supplementary Table 1.** Patient information.

|         | <b>Sex</b> | <b>Ethnicity</b>    | <b>Age</b> | <b>Viral load<br/>(copies/ml)</b> | <b>CD4 count<br/>(cells/<math>\mu</math>l)</b> |
|---------|------------|---------------------|------------|-----------------------------------|------------------------------------------------|
| Donor 1 | Female     | African<br>american | 43         | 39000                             | 443                                            |
| Donor 2 | Male       | Hispanic            | 37         | 23000                             | 654                                            |
| Donor 3 | Female     | Caucasian           | 33         | 50359                             | 108                                            |
| Donor 4 | Female     | African<br>american | 54         | 21744                             | 288                                            |
| Donor 5 | Female     | African<br>american | 43         | 66200                             | 222                                            |
| Donor 6 | Female     | Hispanic            | 43         | 491                               | 375                                            |
| Donor 7 | Female     | African<br>American | 25         | 2799                              | 386                                            |
| Donor 8 | Female     | African<br>American | 27         | 5216                              | 471                                            |
| Donor 9 | Female     | African<br>american | 50         | 3409                              | 670                                            |
