# Supplementary material
Source: PubMed Central journal article supplement (PMC4413902)
Supplement: NIHMS683485-supplement-Supplementary_Figures.pdf [file NIHMS683485-supplement-Supplementary_Figures.pdf]

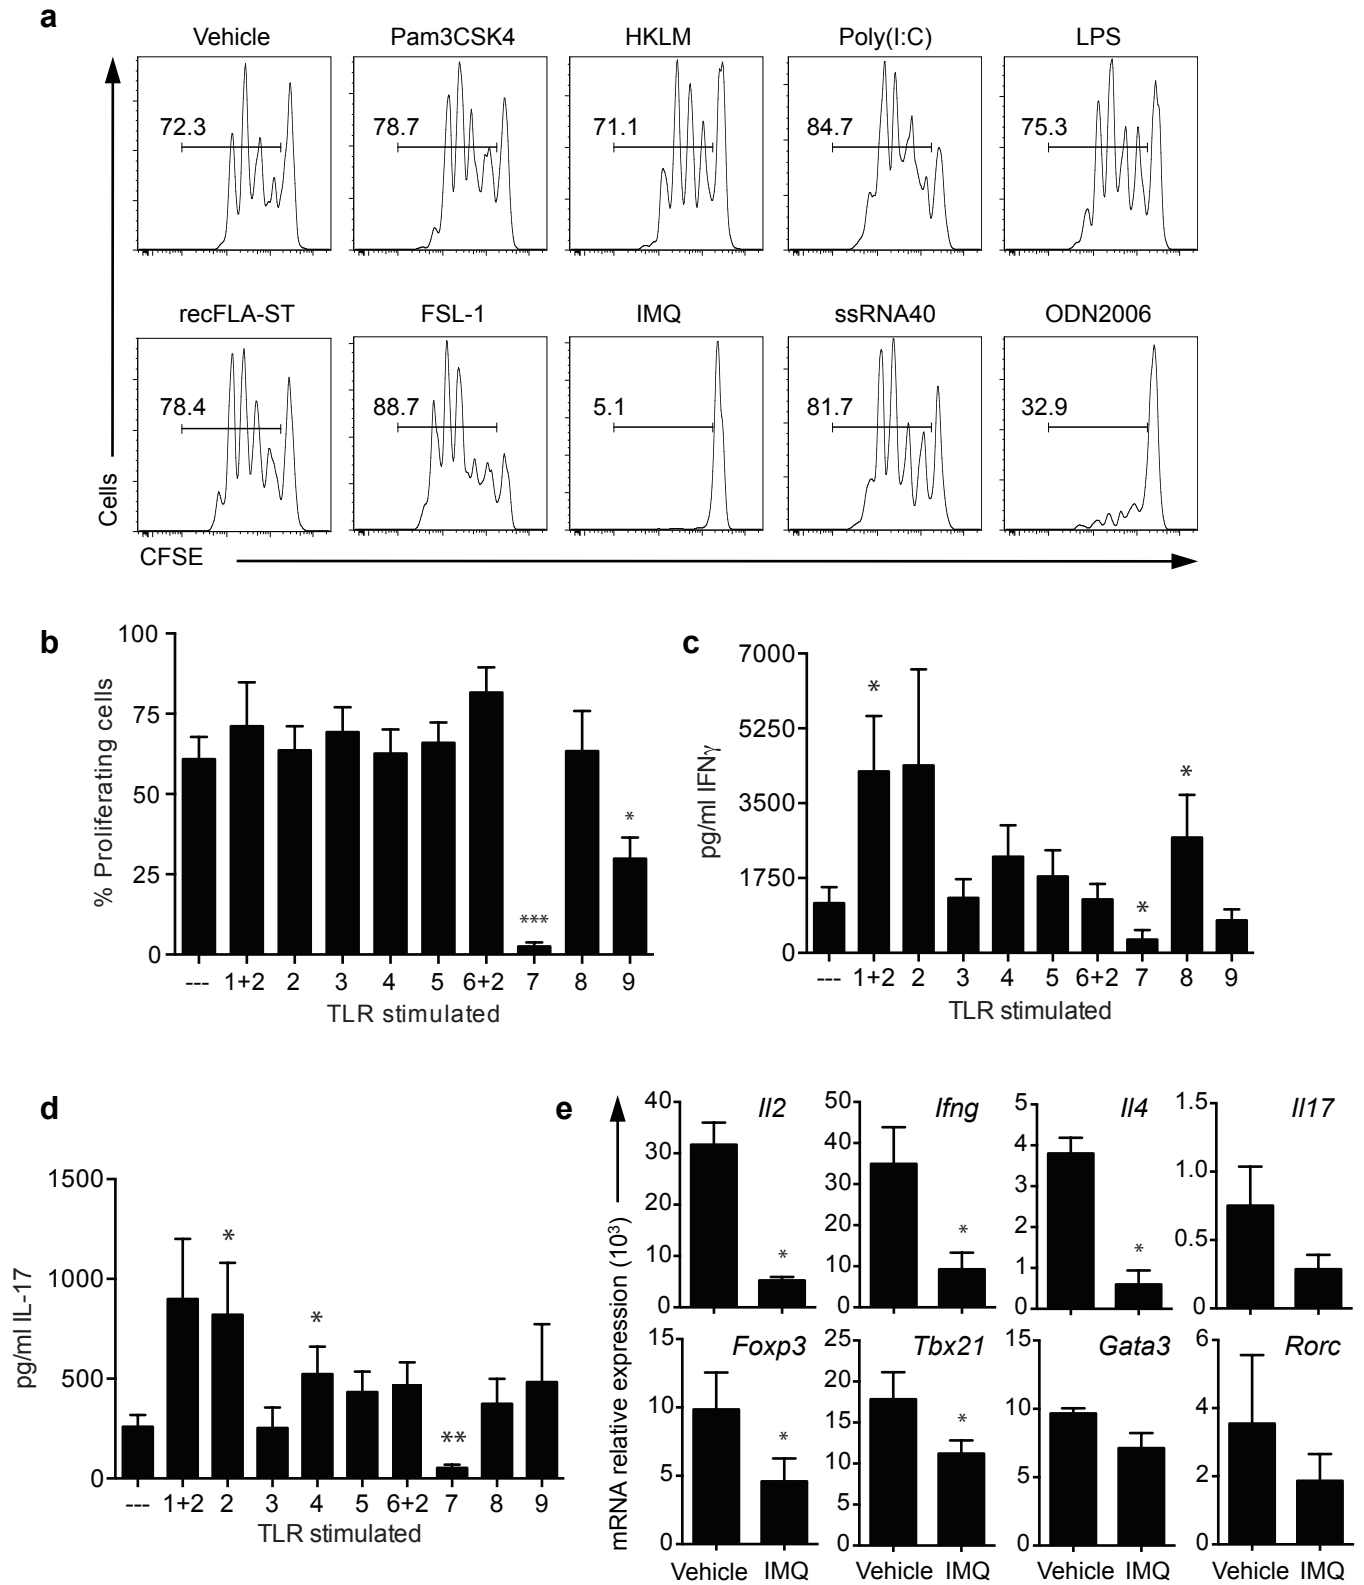

**Supplementary Figure 1.** Costimulatory effects of TLR ligands on CD4<sup>+</sup> T cells

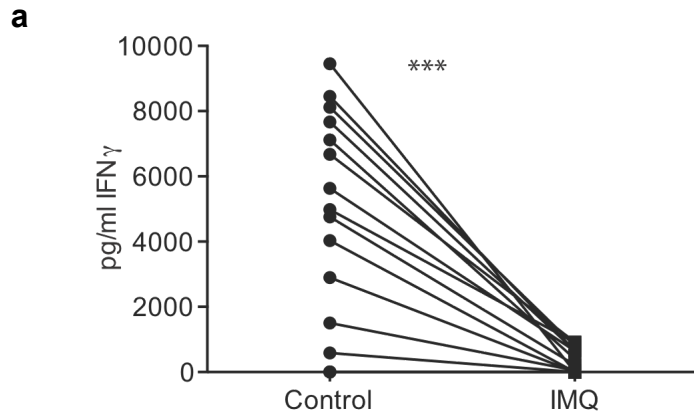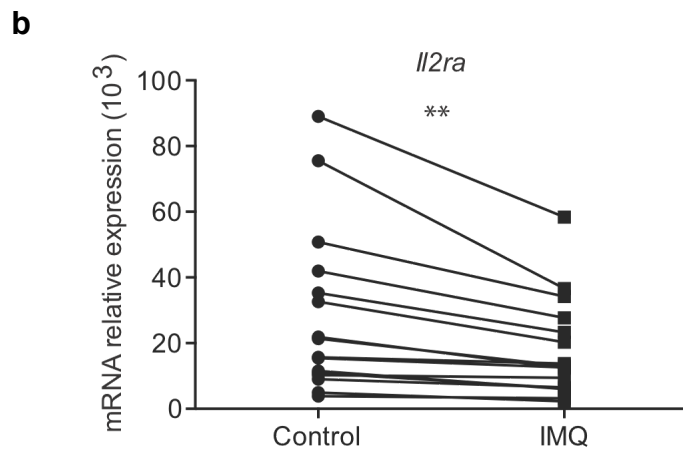

**Supplementary Figure 2.** IMQ inhibits the activation of T cell clones.

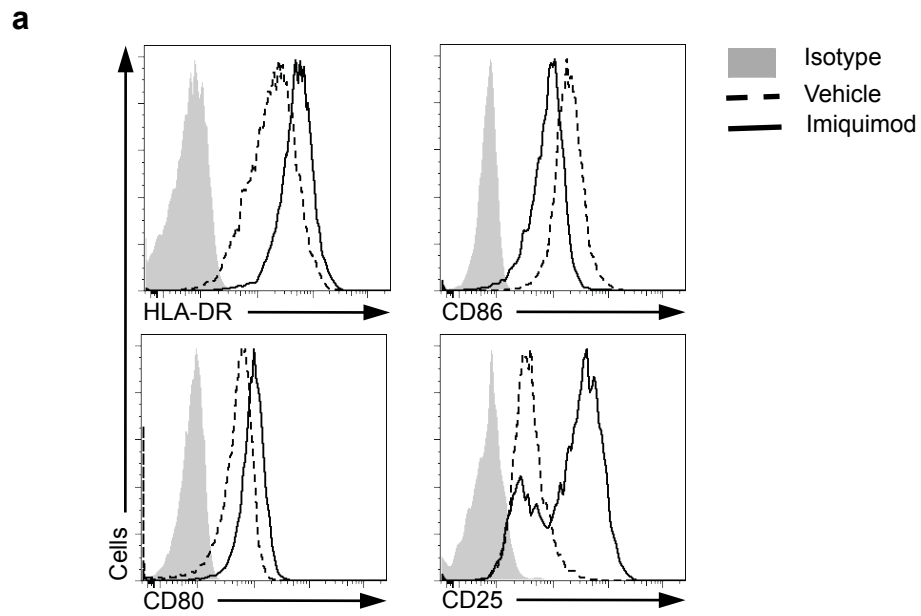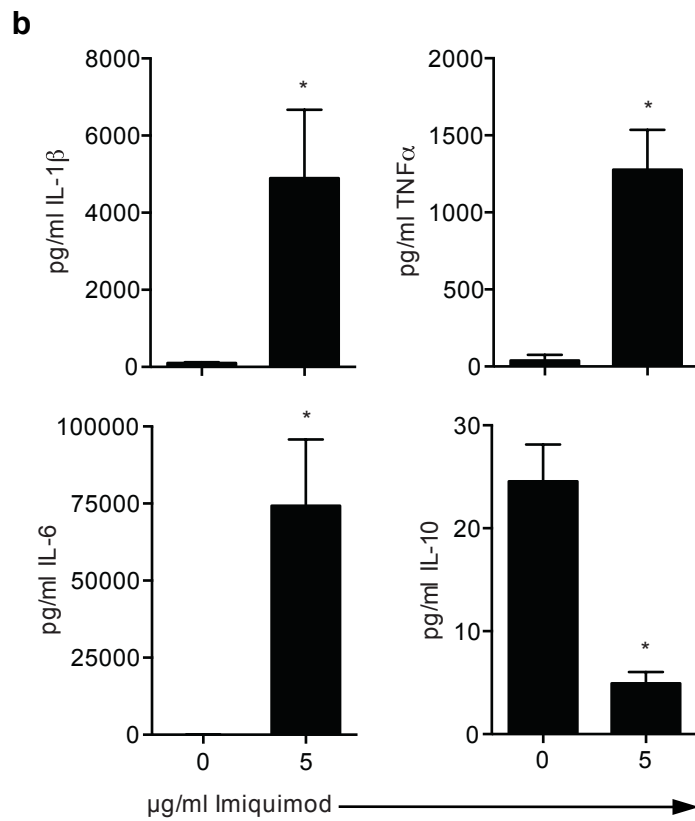

**Supplementary Figure 3.** Monocytes are activated with TLR7 ligands

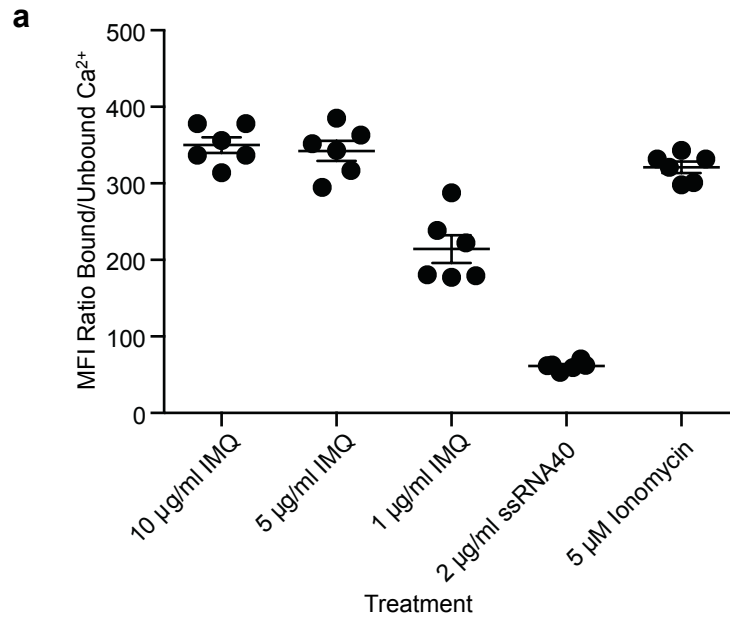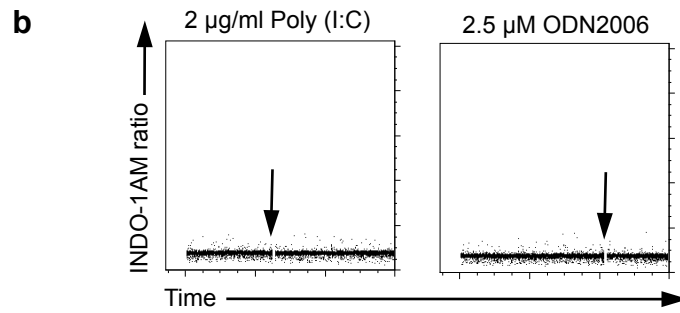

**Supplementary Figure 4. IMQ induces an increase in intracellular calcium concentration**

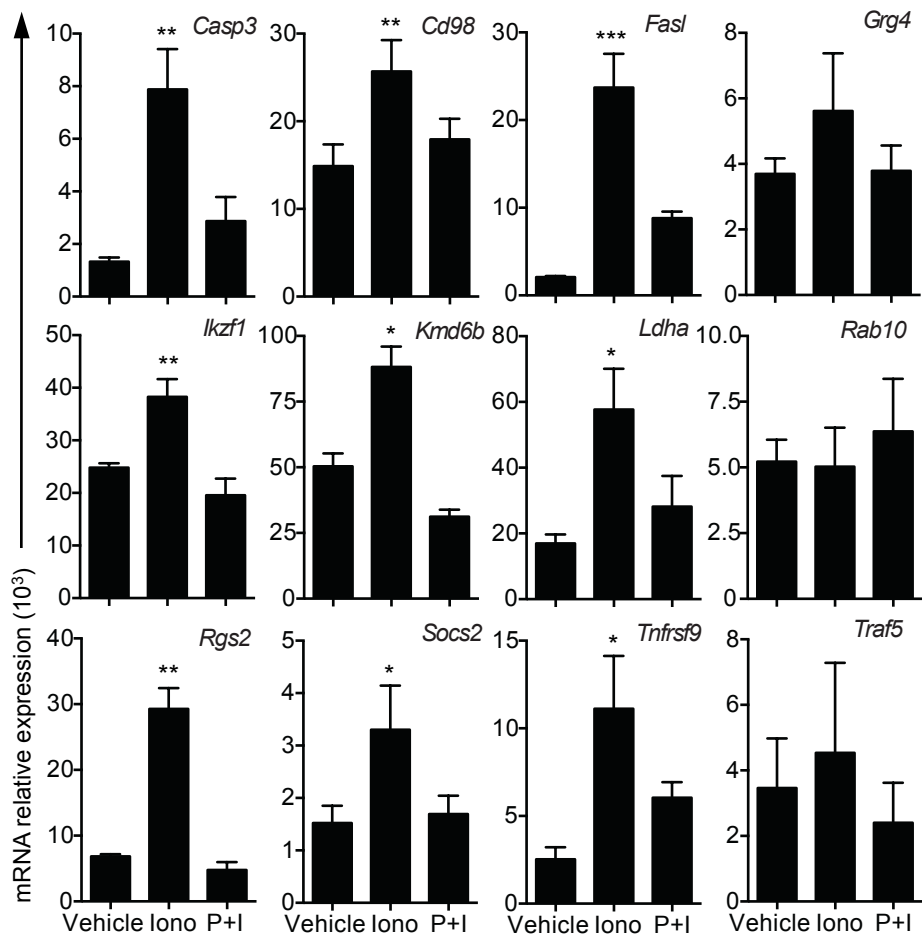

**Supplementary Figure 5.** Anergy-related gene expression with ionomycin and PMA/Ionomycin treatment

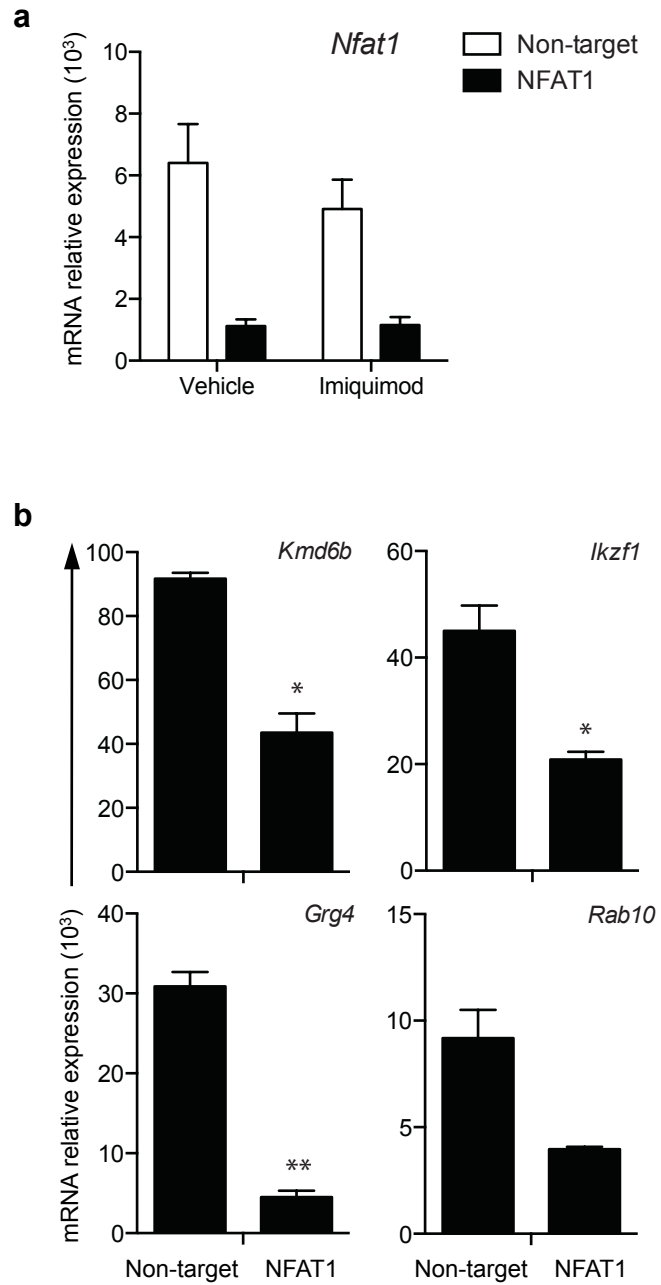

**Supplementary Figure 6.** IMQ fails to upregulate energy-related genes on NFAT KO CD4<sup>+</sup> T cells

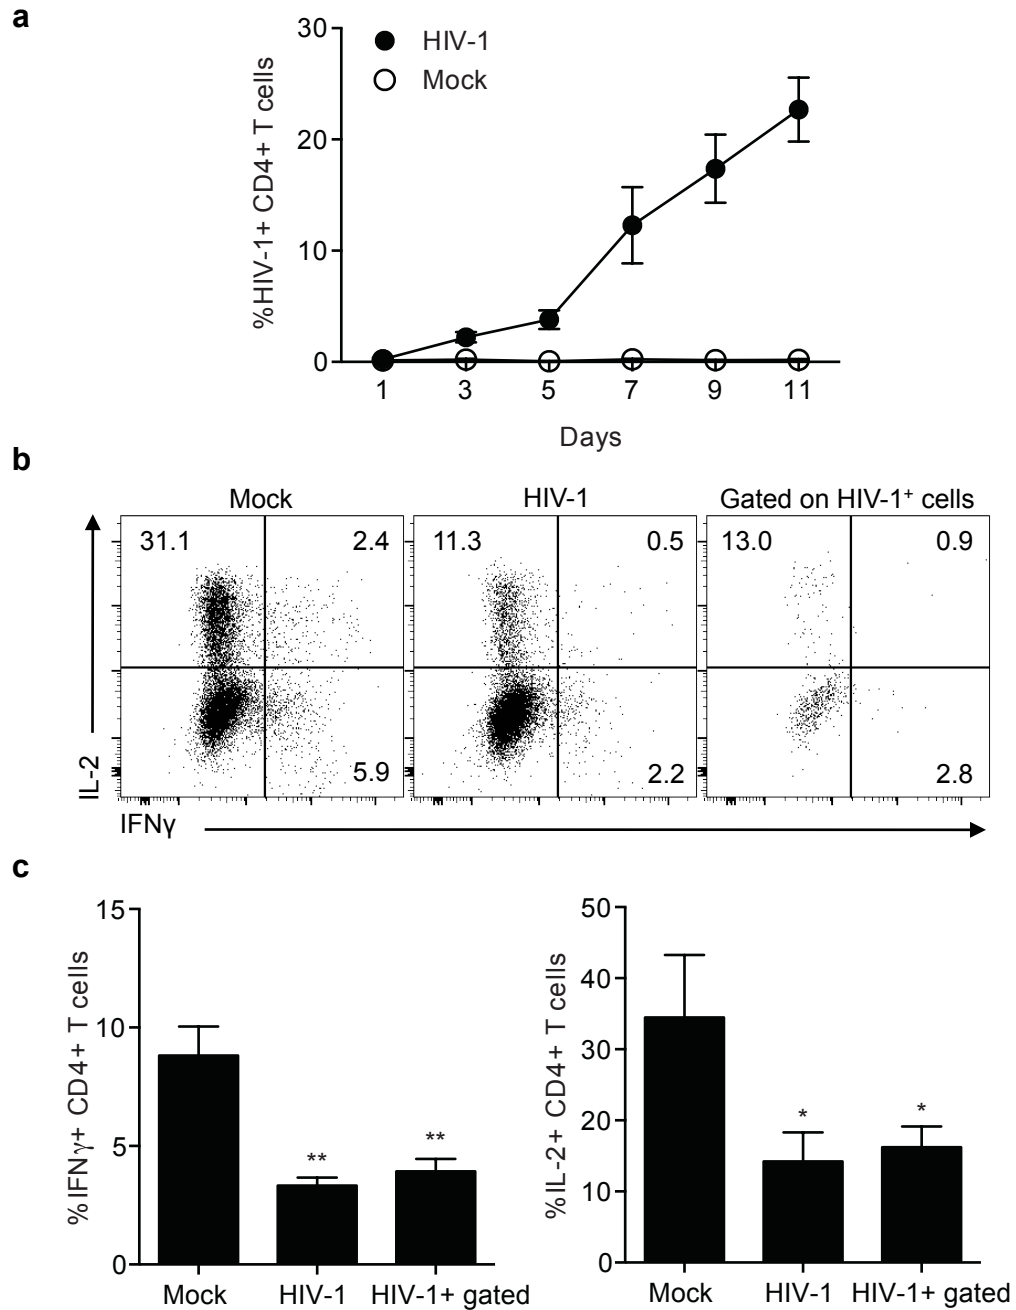

**Supplementary Figure 7.** *In vitro* HIV-1 infection induces anergy on CD4+ T cells

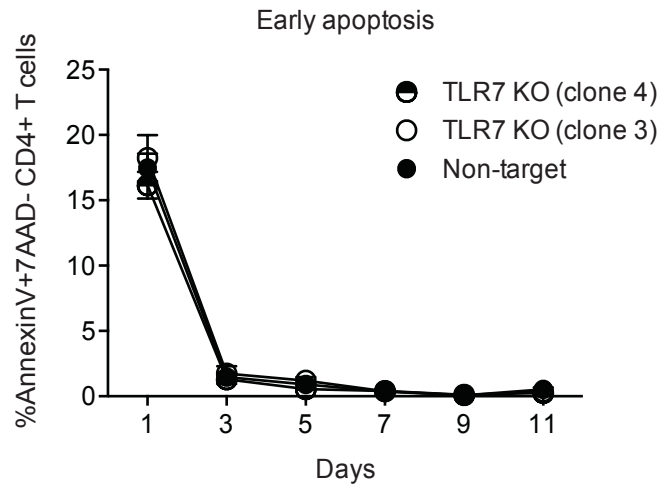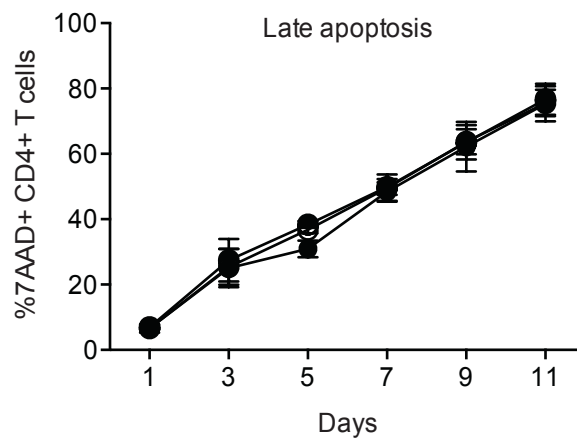

**Supplementary Figure 8.** Apoptosis after HIV-1<sub>NL-D</sub> infection on TLR7-deficient cells.
